# Supplementary material for: Characteristics of Dapagliflozin Responders: A Longitudinal, Prospective, Nationwide Dapagliflozin Surveillance Study in Korea
Source: PubMed Central journal article supplement — Diabetes Ther. 2018 Jul 11;9(4):1689–701. doi: 10.1007/s13300-018-0470-9 (PMC6064582; doi:10.1007/s13300-018-0470-9), 2018-07-11
Supplement: 13300_2018_470_MOESM1_ESM.pdf [file 13300_2018_470_MOESM1_ESM.pdf]

**Table S1.** Summary of adverse events.

| Adverse event                                        | Number (%) of patients | Number of events |
|------------------------------------------------------|------------------------|------------------|
| Any adverse event                                    | 886 (26.3%)            | 1,246            |
| Serious adverse events                               | 53 (1.6%)              | 57               |
| Adverse drug reaction                                | 440 (13.1%)            | 554              |
| Cardiac disorders                                    | 4 (0.1%)               | 4                |
| Eye disorders                                        | 1 (0.03%)              | 1                |
| Gastrointestinal disorders                           | 61 (1.8%)              | 63               |
| General disorders and administration site conditions | 23 (0.7%)              | 24               |
| Infections and infestations                          | 54 (1.6%)              | 54               |
| Investigations (body weight loss, etc.)              | 106 (3.1%)             | 109              |
| Metabolism and nutrition disorders                   | 71 (2.1%)              | 73               |
| Musculoskeletal and connective tissue disorders      | 2 (0.1%)               | 2                |
| Nervous system disorders                             | 25 (0.7%)              | 30               |
| Psychiatric disorders                                | 1 (0.03%)              | 1                |
| Renal and urinary disorders                          | 127 (3.8%)             | 132              |
| Reproductive system and breast disorders             | 40 (1.2%)              | 42               |
| Skin and subcutaneous tissue disorders               | 16 (0.5%)              | 17               |
| Vascular disorders                                   | 2 (0.1%)               | 2                |

Total n=3,371.

**Figure S1.** The receiver operating characteristic (ROC) curve for calculating the cutoff value for the relative change expectation of relative HbA1c levels >10% from the baseline.

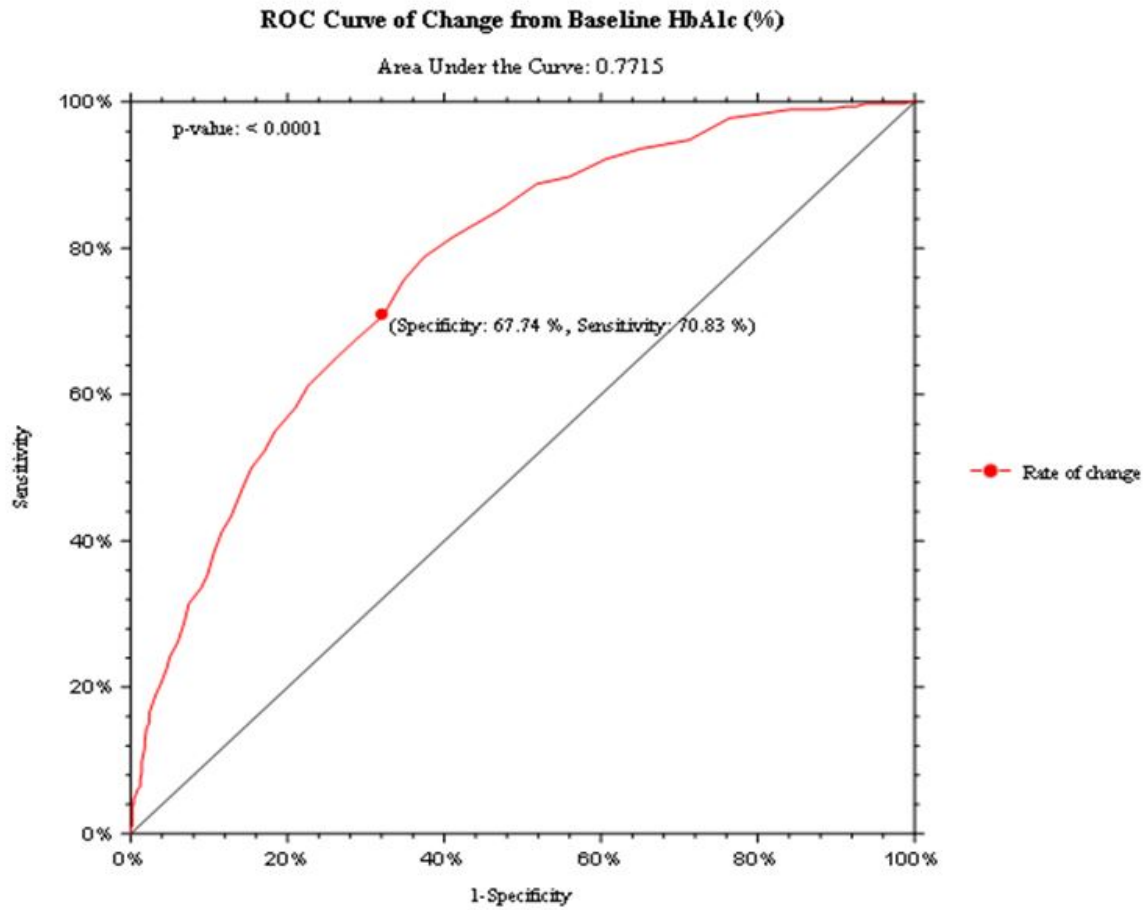

HbA1c reduction from baseline(%) :

$$\text{Rate of change} = \frac{[(\text{Before Forxiga (Baseline)}) - (\text{After Forxiga } (\geq 12 \text{ weeks}))]}{(\text{Before Forxiga (Baseline)})} \times 100$$

Dependent variable:

Rate of change: HbA1c reduction from baseline more than 10% (Reference= HbA1c reduction less than 10%)

Subjects with all information of HbA1c in prior to and after administration Forxiga are analyzed
